# Supplementary material for: Synthesis of New [1,2,4]Triazolo[3,4-b][1,3,4]thiadiazines and Study of Their Anti-Candidaland Cytotoxic Activities
Source: Hindawi journal article supplement (doi:10.1155/2014/897141), 2014-01-01

**Synthesis of new [1,2,4]triazolo[3,4-*b*][1,3,4]thiadiazines and study of their anti-*Candidal*  
and cytotoxic activities**

Mashooq Ahmad Bhat<sup>a,\*</sup>, Abdul Arif Khan<sup>b</sup>, Shahanavaj Khan<sup>b</sup>, Abdullah Al-Dhfyhan<sup>c</sup>

<sup>a</sup>*Department of Pharmaceutical Chemistry, College of Pharmacy, King Saud University, P.O. Box 2457, Riyadh 11451, Kingdom of Saudi Arabia.*

<sup>b</sup>*Department of Pharmaceutics, College of Pharmacy, King Saud University, P.O. Box 2457, Riyadh 11451, Kingdom of Saudi Arabia.*

<sup>c</sup>*Stem Cell & Tissue Re-Engineering Program, Research Center, King Faisal Specialized Hospital & Research Center, MBC-03, P. O. Box 3354, Riyadh 11211, Saudi Arabia.*

\*Corresponding author: Tel. +966-1-4677343, Fax. +966-1-4676220.

E- mail address: [mashooqbhat@rediffmail.com](mailto:mashooqbhat@rediffmail.com) (M. A. Bhat).

-BBO DMSO D: \\ at

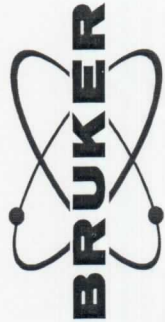

NAME dirmashooq-5A  
 EXPNO 12  
 PROCNO 1  
 Date\_ 20140130  
 Time\_ 10.59  
 INSTRUM spect  
 PROBHD 5 mm PABBO BB-  
 PULPROG zgpg30  
 TD 65536  
 SOLVENT DMSO  
 NS 1024  
 DS 4  
 SWH 30030.029 Hz  
 FIDRES 0.458222 Hz  
 AQ 1.0912410 sec  
 RG 16384  
 DW 16.650 usec  
 DE 6.50 usec  
 TE 297.5 K  
 D1 2.00000000 sec  
 D11 0.03000000 sec  
 TD0 1

=====  
 CHANNEL f1 =====  
 NUC1 13C  
 P1 20.00 usec  
 PL1 -6.00 dB  
 SFO1 125.7703643 MHz

=====  
 CHANNEL f2 =====  
 CPDPRG2 waltz16  
 NUC2 1H  
 PCPD2 80.00 usec  
 PL2 -1.10 dB  
 PL12 13.44 dB  
 PL13 16.40 dB  
 SFO2 500.1320005 MHz  
 SI 32768  
 SF 125.7578519 MHz  
 WDW EM  
 SSB 0  
 LB 3.00 Hz  
 GB 0  
 PC 1.40

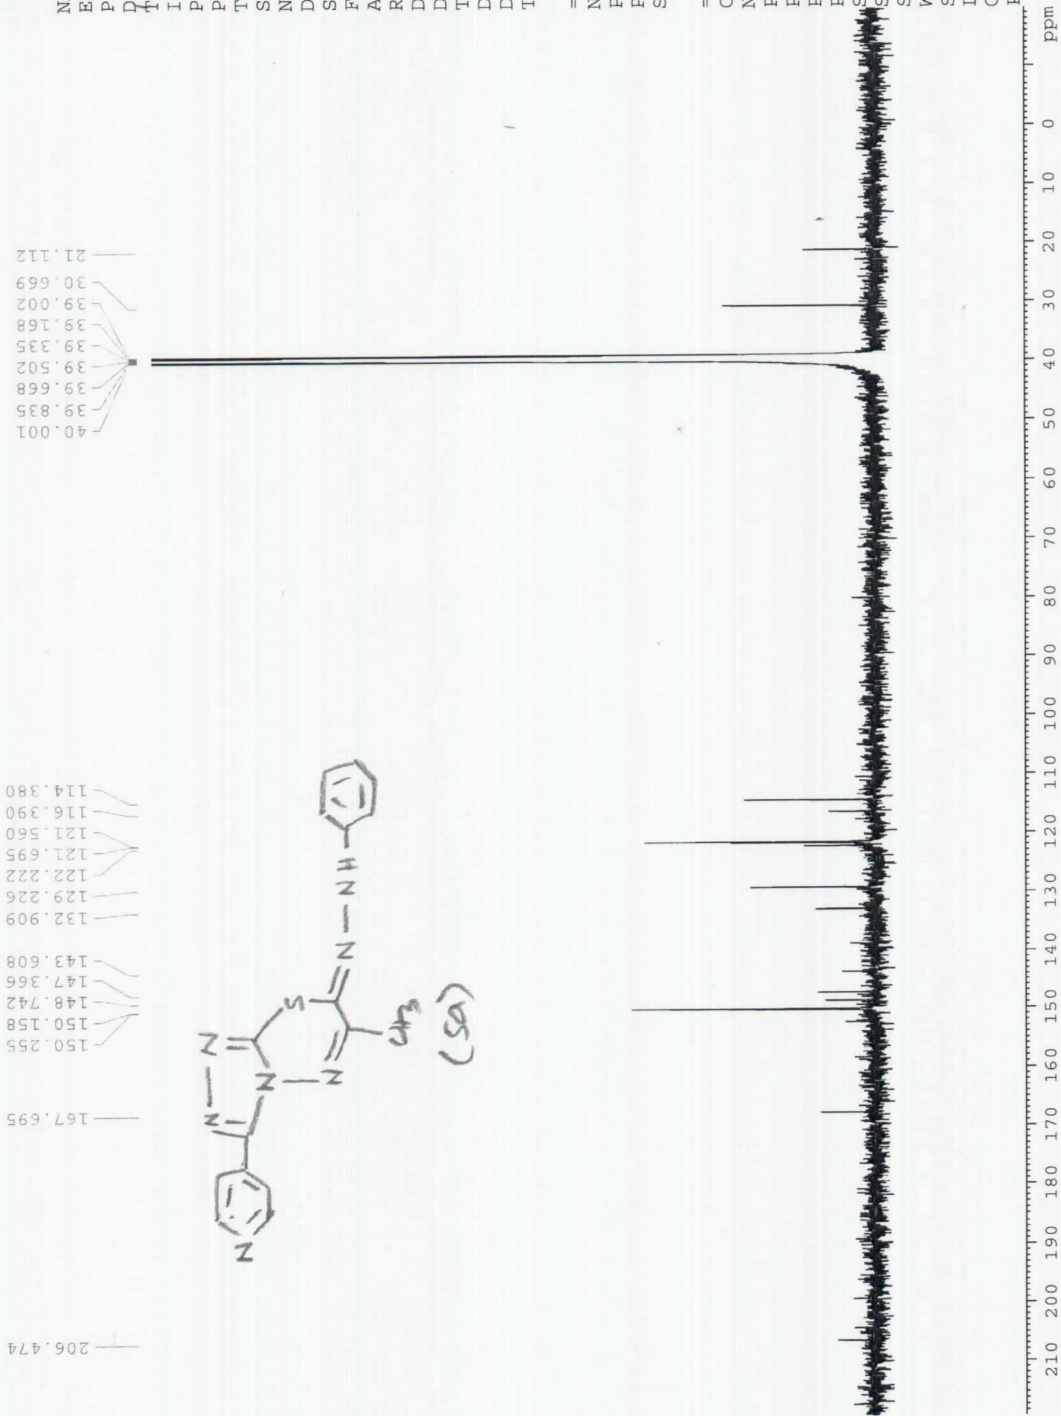

40.001  
 39.835  
 39.668  
 39.502  
 39.335  
 39.168  
 39.002  
 30.669  
 21.112

206.474  
 167.695  
 150.255  
 150.158  
 148.742  
 147.366  
 143.608  
 132.909  
 129.226  
 122.222  
 121.695  
 121.560  
 116.390  
 114.380

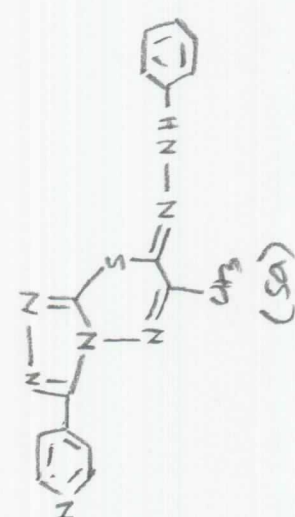

-BBO DMSO D: \ \ m

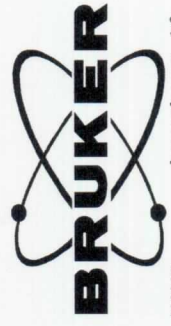

NAME drmarshooq-10  
 EXPNO 10  
 PROCNO 1  
 Date\_ 20111206  
 Time 22.01  
 INSTRUM spect  
 PROBHD 5 mm BBO BB-1H  
 PULPROG zg30  
 TD 65536  
 SOLVENT DMSO  
 NS 16  
 DS 2  
 SWH 10330.578 Hz  
 FIDRES 0.157632 Hz  
 AQ 3.1720407 sec  
 RG 512  
 DW 48.400 usec  
 DE 6.50 usec  
 TE 297.1 K  
 D1 1.00000000 sec  
 TD0 1

==== CHANNEL f1 =====  
 NUC1 1H  
 P1 10.50 usec  
 PL1 -3.00 dB  
 SF01 500.1330885 MHz  
 SI 32768  
 SF 500.1300000 MHz  
 WDW EM  
 SSB 0  
 LB 0.30 Hz  
 GB 0  
 PC 1.00

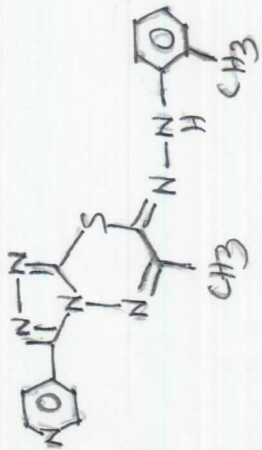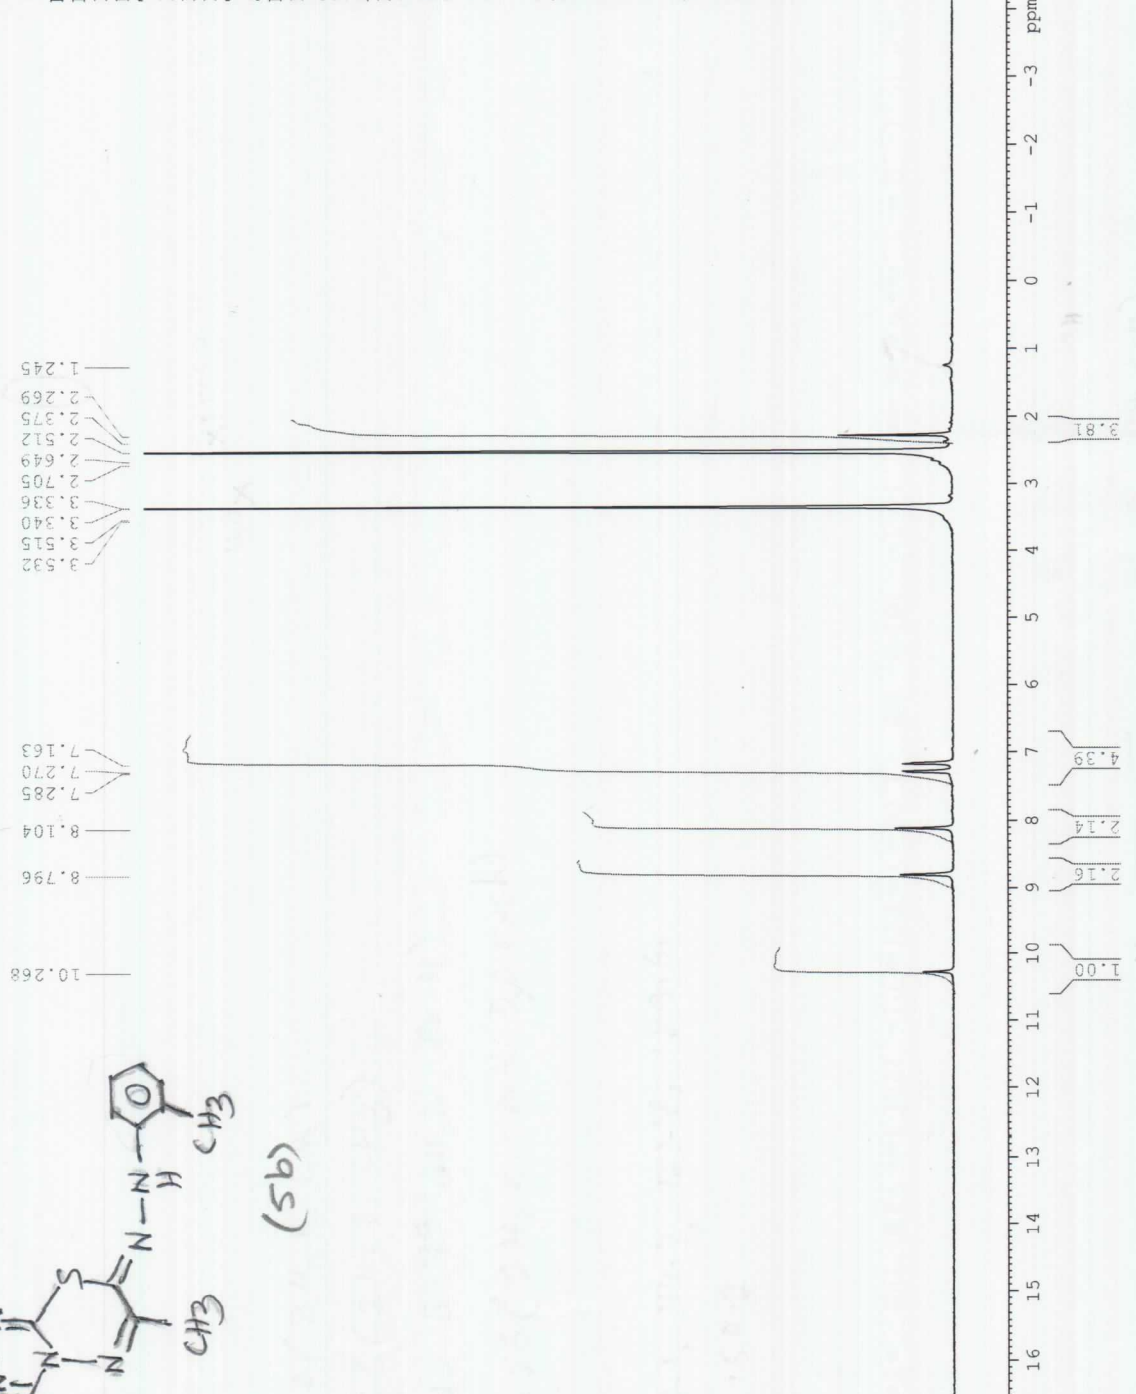

<sup>1</sup>H NMR Spectra of 5b.

3BO DMSO D:\ \ mmj

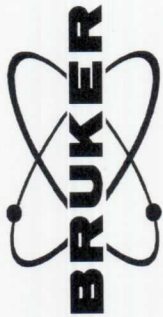

NAME drmarshooq-10  
 EXPNO 11  
 PROCNO 1  
 Date\_ 20111206  
 Time 23.49  
 INSTRUM spect  
 PROBHD 5 mm BBO BB-1H  
 PULPROG zgpg30  
 TD 65536  
 SOLVENT DMSO  
 NS 2048  
 DS 4  
 SWH 30030.029 Hz  
 FIDRES 0.458222 Hz  
 AQ 1.0912410 sec  
 RG 1625.5  
 DW 16.650 usec  
 DE 6.50 usec  
 TE 297.8 K  
 D1 2.00000000 sec  
 D11 0.03000000 sec  
 TD0 1

==== CHANNEL f1 =====  
 NUC1 13C  
 P1 5.80 usec  
 PL1 -2.00 dB  
 SF01 125.7703643 MHz

==== CHANNEL f2 =====  
 CPDPRG2 waltz16  
 NUC2 1H  
 PCPD2 80.00 usec  
 PL2 -3.00 dB  
 PL12 14.64 dB  
 PL13 17.64 dB  
 SF02 500.1320005 MHz  
 SI 32768  
 SF 125.7578519 MHz  
 WDW EM  
 SSB 0  
 LB 3.00 Hz  
 GB 0  
 PC 1.40

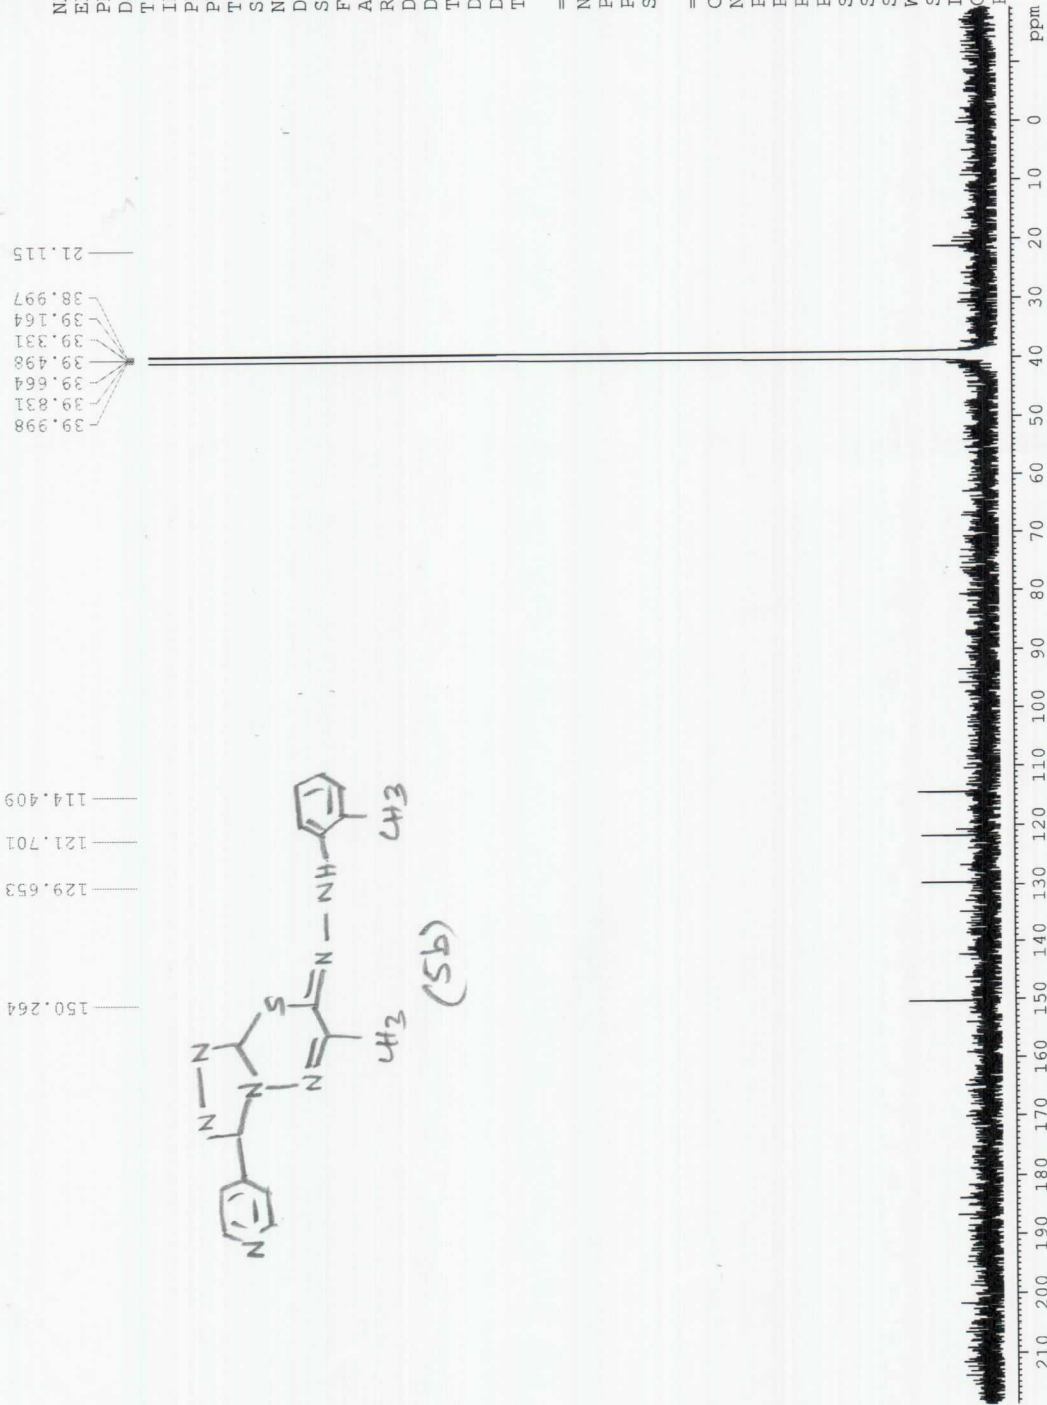

10

-BBO DMSO D: \ \ m

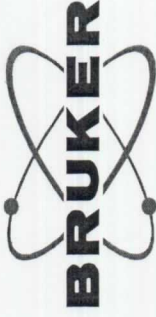

NAME drmashooq-11  
 EXPNO 10  
 PROCNO 1  
 Date 20111206  
 Time 20.08  
 INSTRUM spect  
 PROBHD 5 mm BBO BB-1H  
 PULPROG zg30  
 TD 65536  
 SOLVENT DMSO  
 NS 16  
 DS 2  
 SWH 10330.578 Hz  
 FIDRES 0.157632 Hz  
 AQ 3.1720407 sec  
 RG 456.1  
 DW 48.400 usec  
 DE 6.50 usec  
 TE 297.0 K  
 D1 1.00000000 sec  
 TD0 1

==== CHANNEL f1 =====  
 NUC1 1H  
 P1 10.50 usec  
 PL1 -3.00 dB  
 SF01 500.1330885 MHz  
 SI 32768  
 SF 500.1300000 MHz  
 WDW EM  
 SSB 0  
 LB 0.30 Hz  
 GB 0  
 PC 1.00

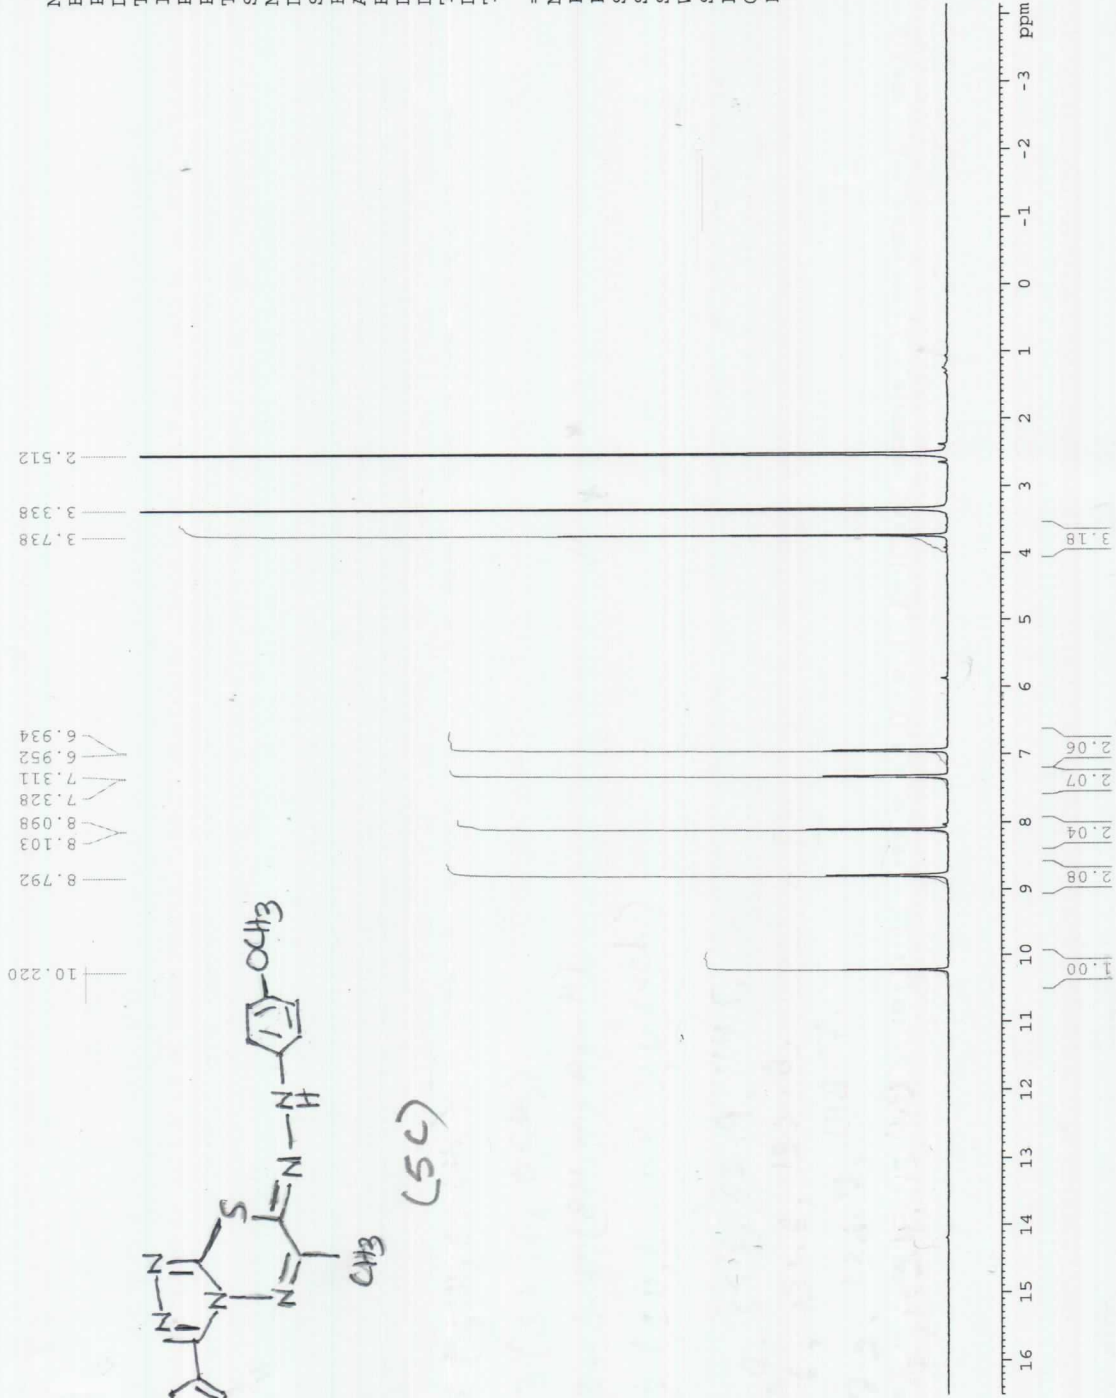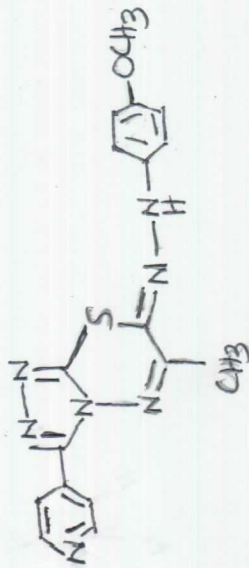

(5c)

<sup>1</sup>H NMR spectra of 5c.

3BO DMSO D: \\ mmj

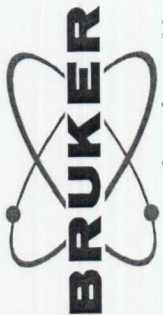

NAME drmarshooq-11  
 EXPNO 11  
 PROCNO 1  
 Date 20111206  
 Time 21.56  
 INSTRUM spect  
 PROBDH 5 mm BBO BB-1H  
 PULPROG zgpg30  
 TD 65536  
 SOLVENT DMSO  
 NS 2048  
 DS 4  
 SWH 30030.029 Hz  
 FIDRES 0.458222 Hz  
 AQ 1.0912410 sec  
 RG 1625.5  
 DW 16.650 usec  
 DE 6.50 usec  
 TE 297.7 K  
 D1 2.0000000 sec  
 D11 0.0300000 sec  
 TD0 1

==== CHANNEL f1 =====  
 NUC1 13C  
 P1 5.80 usec  
 PL1 -2.00 dB  
 SFO1 125.7703643 MHz  
 ===== CHANNEL f2 =====  
 CPDPRG2 waltz16  
 NUC2 1H  
 PCPD2 80.00 usec  
 PL2 -3.00 dB  
 PL12 14.64 dB  
 PL13 17.64 dB  
 SFO2 500.1320005 MHz  
 SI 32768  
 SF 125.7578519 MHz  
 WDW EM  
 SSB 0  
 LB 3.00 Hz  
 GB 0  
 PC 1.40

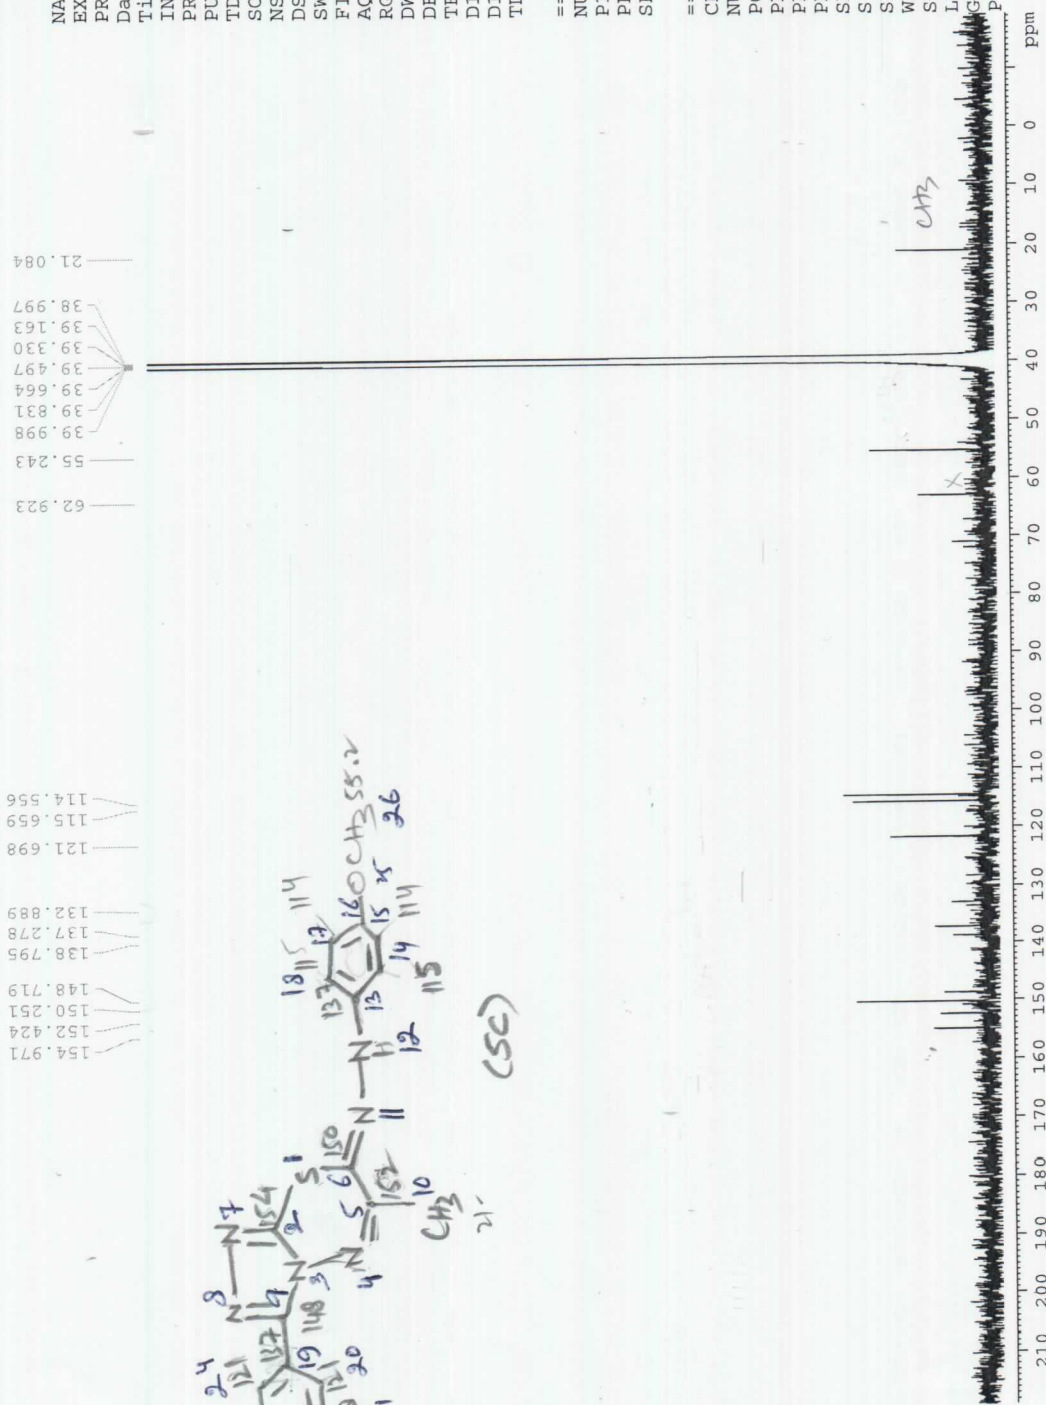

13C NMR spectra of 5c.

11

-BBO DMSO D:\ \ m

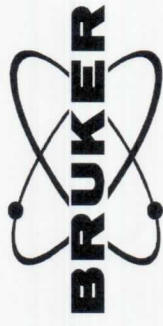

NAME drmashooq-12  
 EXPNO 10  
 PROCNO 1  
 Date\_ 20111206  
 Time\_ 18.16  
 INSTRUM spect  
 PROBHD 5 mm BBO BB-1H  
 PULPROG zg30  
 TD 65536  
 SOLVENT DMSO  
 NS 16  
 DS 2  
 SWH 10330.578 Hz  
 FIDRES 0.157632 Hz  
 AQ 3.1720407 sec  
 RG 362  
 DW 48.400 usec  
 DE 6.50 usec  
 TE 296.8 K  
 D1 1.00000000 sec  
 TD0 1

===== CHANNEL f1 =====  
 NUC1 1H  
 P1 10.50 usec  
 PL1 -3.00 dB  
 SF01 500.1330885 MHz  
 SI 32768  
 SF 500.1300000 MHz  
 WDW EM  
 SSB 0  
 LB 0.30 Hz  
 GB 0  
 PC 1.00

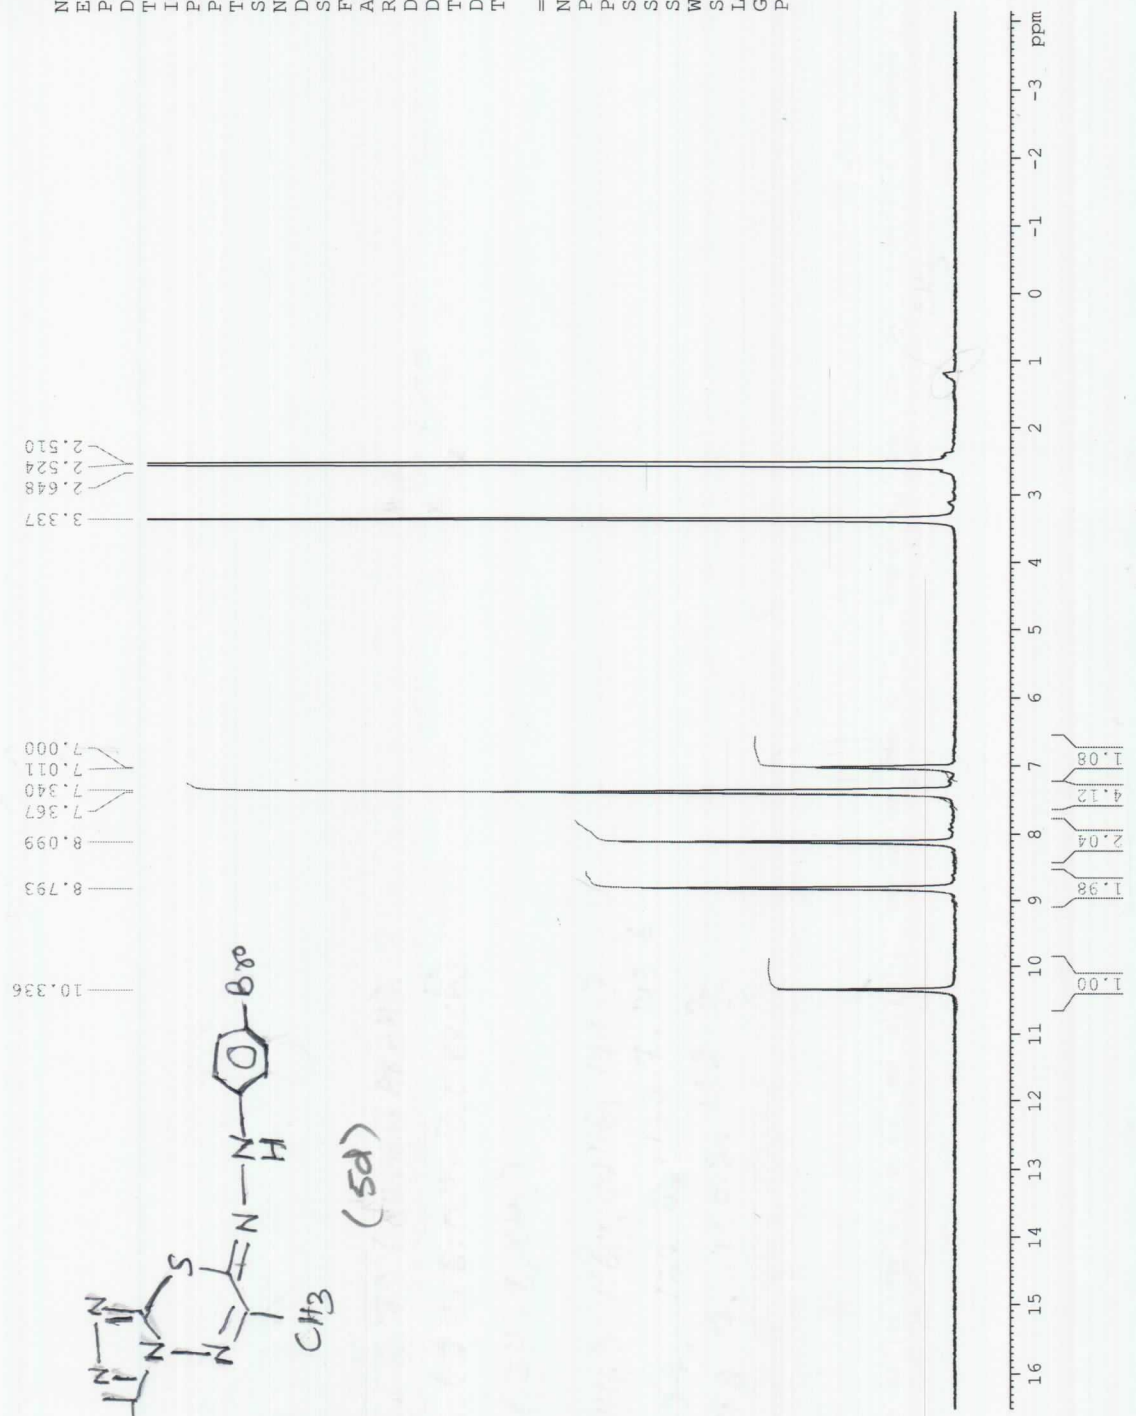

1H NMR spectra of 11

3B0 DMSO D:\ \ mmj

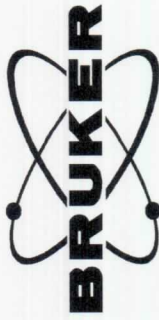

NAME drmarshooq-12  
 EXPNO 11  
 PROCNO 1  
 Date\_ 20111206  
 Time\_ 20.04  
 INSTRUM spect  
 PROBHD 5 mm BBO BB-1H  
 PULPROG zgpg30  
 TD 65536  
 SOLVENT DMSO  
 NS 2048  
 DS 4  
 SWH 30030.029 Hz  
 FIDRES 0.458222 Hz  
 AQ 1.0912410 sec  
 RG 1625.5  
 DW 16.650 usec  
 DE 6.50 usec  
 TE 297.6 K  
 D1 2.00000000 sec  
 D11 0.03000000 sec  
 TD0 1

==== CHANNEL f1 =====  
 NUC1 13C  
 P1 5.80 usec  
 PL1 -2.00 dB  
 SFO1 125.7703643 MHz

==== CHANNEL f2 =====  
 CPDPRG2 waltz16  
 NUC2 1H  
 PCPD2 80.00 usec  
 PL2 -3.00 dB  
 PL12 14.64 dB  
 PL13 17.64 dB  
 SFO2 500.1320005 MHz  
 SI 32768  
 SF 125.7578519 MHz  
 EM 0  
 WDW 0  
 SSB 0  
 LB 3.00 Hz  
 GB 0  
 PC 1.40

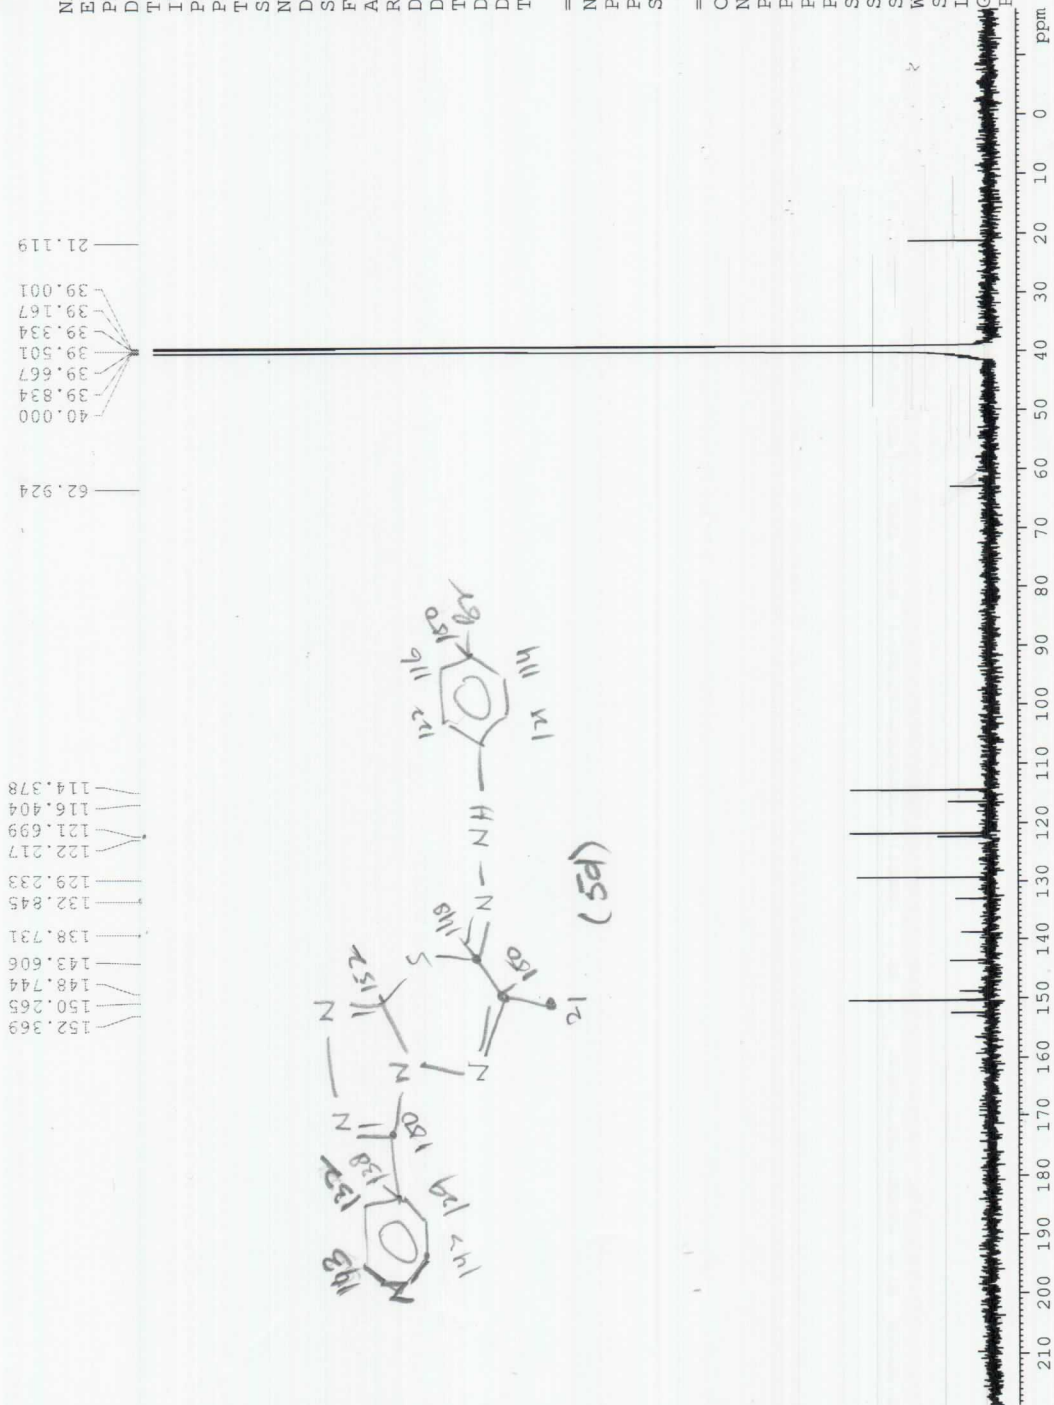

<sup>13</sup>C NMR spectra of 5d.



3B0 DMSO D:\ \ mmj

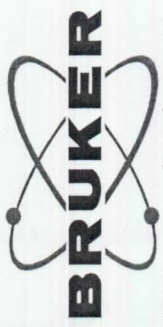

NAME drmarshooq-13  
 EXPNO 11  
 PROCNO 1  
 Date\_ 20111206  
 Time 18.12  
 INSTRUM spect  
 PROBHD 5 mm BBO BB-1H  
 PULPROG zgpg30  
 TD 65536  
 SOLVENT DMSO  
 NS 2048  
 DS 4  
 SWH 30030.029 Hz  
 FIDRES 0.458222 Hz  
 AQ 1.0912410 sec  
 RG 1625.5  
 DW 16.650 usec  
 DE 6.50 usec  
 TE 297.3 K  
 D1 2.00000000 sec  
 D11 0.03000000 sec  
 TD0 1

==== CHANNEL f1 =====  
 NUC1 13C  
 P1 5.80 usec  
 PL1 -2.00 dB  
 SF01 125.7703643 MHz  
 ===== CHANNEL f2 =====  
 CPDPRG2 waltz16  
 NUC2 1H  
 PCPD2 80.00 usec  
 PL2 -3.00 dB  
 PL12 14.64 dB  
 PL13 17.64 dB  
 SF02 500.1320005 MHz  
 ST 32768  
 SF 125.7578519 MHz  
 WDW EM  
 SSB 0  
 LB 0  
 GB 0  
 PC 1.40

167.688  
 152.162  
 150.288  
 150.148  
 148.797  
 147.364  
 146.229  
 138.565  
 137.144  
 132.773  
 127.296  
 121.721  
 121.566  
 119.124  
 113.973

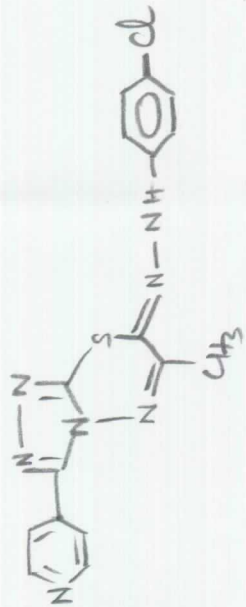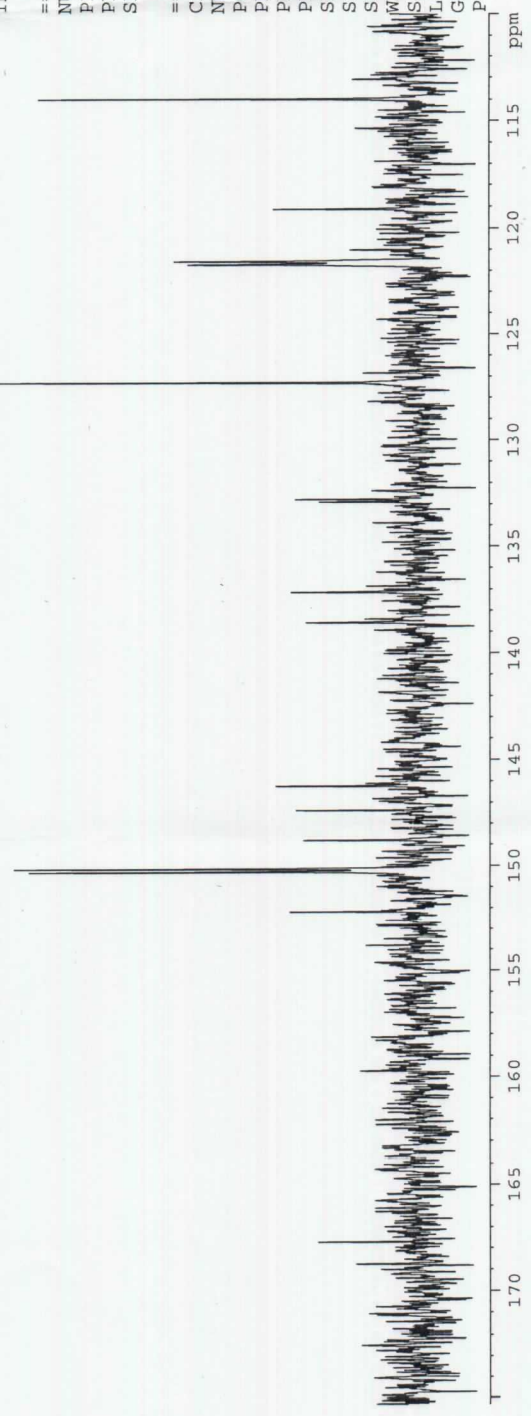

-BBO DMSO D: \\ at

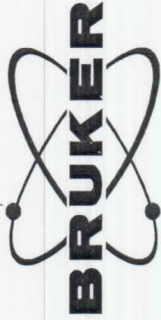

NAME drmashtooq-5F  
EXPNO 11  
PROCNO 1  
Date\_ 20140129  
Time 23.28  
INSTRUM spect  
PROBHD 5 mm PABBO BB-  
PULPROG zgpg30  
TD 65536  
SOLVENT DMSO  
NS 1500  
DS 4  
SWH 30030.029 Hz  
FIDRES 0.458222 Hz  
AQ 1.0912410 sec  
RG 18390.4  
DW 16.650 usec  
DE 6.50 usec  
TE 324.5 K  
D1 2.00000000 sec  
D11 0.03000000 sec  
TD0 1

==== CHANNEL f1 =====  
NUC1 13C  
P1 20.00 usec  
PL1 -6.00 dB  
SFO1 125.7703643 MHz

==== CHANNEL f2 =====  
CPDPRG2 waltz16  
NUC2 1H  
PCPD2 80.00 usec  
PL2 -1.10 dB  
PL12 13.44 dB  
PL13 16.40 dB  
SFO2 500.1320005 MHz  
SI 32768  
SF 125.7578519 MHz  
WDW EM  
SSB 0  
LB 3.00 Hz  
GB 0  
PC 1.40

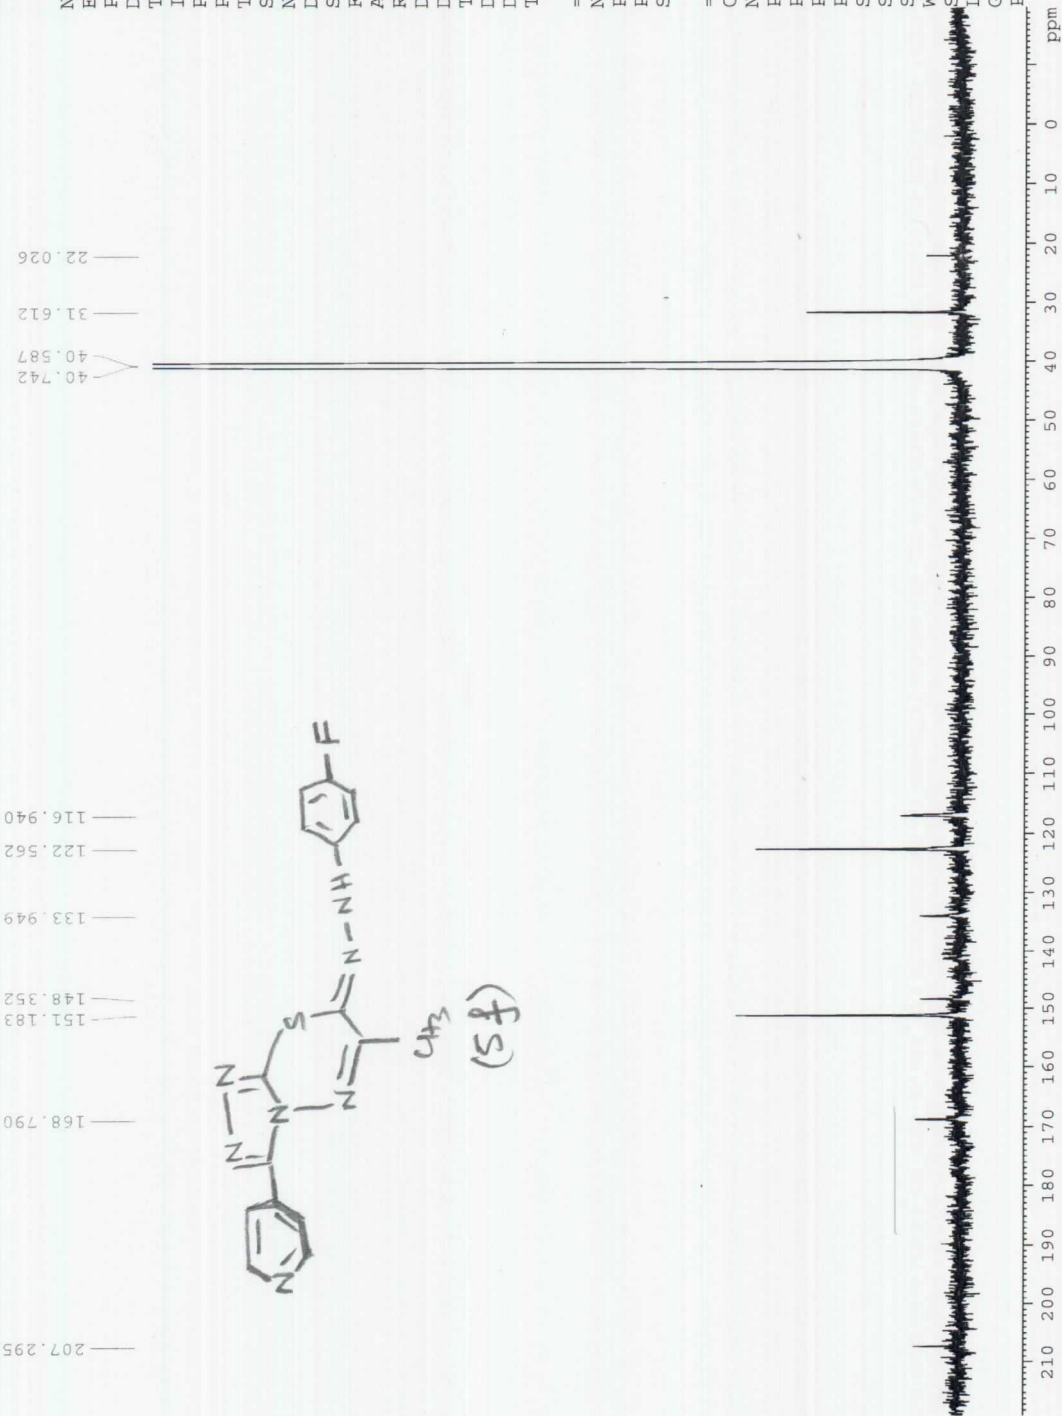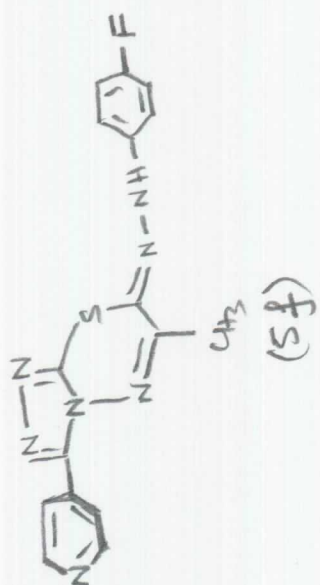

-BBO DMSO D: \\ at

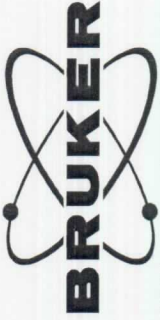

NAME dirmashoog-5G  
 EXPNO 11  
 PROCNO 1  
 Date 20140128  
 Time 22.46  
 INSTRUM spect  
 PROBHD 5 mm PABBO BB-  
 PULPROG zgpg30  
 TD 65536  
 SOLVENT DMSO  
 NS 1500  
 DS 4  
 SWH 30030.029 Hz  
 FIDRES 0.458222 Hz  
 AQ 1.0912410 sec  
 RG 18390.4  
 DW 16.650 usec  
 DE 6.50 usec  
 TE 298.4 K  
 D1 2.00000000 sec  
 D11 0.03000000 sec  
 TD0 1

=====  
 CHANNEL f1 =====  
 NUC1 13C  
 P1 20.00 usec  
 PL1 -6.00 dB  
 SF01 125.7703643 MHz

=====  
 CHANNEL f2 =====  
 CPDPRG2 waltz16  
 NUC2 1H  
 PCPD2 80.00 usec  
 PL2 -1.10 dB  
 PL12 13.44 dB  
 PL13 16.40 dB  
 SFO2 500.1320005 MHz  
 SI 32768  
 SF 125.7578519 MHz  
 WDW EM  
 SSB 0  
 LB 3.00 Hz  
 GB 0  
 PC 1.40

39.999  
 39.832  
 39.665  
 39.498  
 39.331  
 39.164  
 38.998  
 38.832  
 38.665  
 38.498  
 38.331  
 38.164  
 37.998  
 37.832  
 37.665  
 37.498  
 37.331  
 37.164  
 36.998  
 36.832  
 36.665  
 36.498  
 36.331  
 36.164  
 35.998  
 35.832  
 35.665  
 35.498  
 35.331  
 35.164  
 34.998  
 34.832  
 34.665  
 34.498  
 34.331  
 34.164  
 33.998  
 33.832  
 33.665  
 33.498  
 33.331  
 33.164  
 32.998  
 32.832  
 32.665  
 32.498  
 32.331  
 32.164  
 31.998  
 31.832  
 31.665  
 31.498  
 31.331  
 31.164  
 30.998  
 30.832  
 30.665  
 30.498  
 30.331  
 30.164  
 29.998  
 29.832  
 29.665  
 29.498  
 29.331  
 29.164  
 28.998  
 28.832  
 28.665  
 28.498  
 28.331  
 28.164  
 27.998  
 27.832  
 27.665  
 27.498  
 27.331  
 27.164  
 26.998  
 26.832  
 26.665  
 26.498  
 26.331  
 26.164  
 25.998  
 25.832  
 25.665  
 25.498  
 25.331  
 25.164  
 24.998  
 24.832  
 24.665  
 24.498  
 24.331  
 24.164  
 23.998  
 23.832  
 23.665  
 23.498  
 23.331  
 23.164  
 22.998  
 22.832  
 22.665  
 22.498  
 22.331  
 22.164  
 21.998  
 21.832  
 21.665  
 21.498  
 21.331  
 21.164  
 20.998  
 20.832  
 20.665  
 20.498  
 20.331  
 20.164  
 19.998  
 19.832  
 19.665  
 19.498  
 19.331  
 19.164  
 18.998  
 18.832  
 18.665  
 18.498  
 18.331  
 18.164  
 17.998  
 17.832  
 17.665  
 17.498  
 17.331  
 17.164  
 16.998  
 16.832  
 16.665  
 16.498  
 16.331  
 16.164  
 15.998  
 15.832  
 15.665  
 15.498  
 15.331  
 15.164  
 14.998  
 14.832  
 14.665  
 14.498  
 14.331  
 14.164  
 13.998  
 13.832  
 13.665  
 13.498  
 13.331  
 13.164  
 12.998  
 12.832  
 12.665  
 12.498  
 12.331  
 12.164  
 11.998  
 11.832  
 11.665  
 11.498  
 11.331  
 11.164  
 10.998  
 10.832  
 10.665  
 10.498  
 10.331  
 10.164  
 9.998  
 9.832  
 9.665  
 9.498  
 9.331  
 9.164  
 8.998  
 8.832  
 8.665  
 8.498  
 8.331  
 8.164  
 7.998  
 7.832  
 7.665  
 7.498  
 7.331  
 7.164  
 6.998  
 6.832  
 6.665  
 6.498  
 6.331  
 6.164  
 5.998  
 5.832  
 5.665  
 5.498  
 5.331  
 5.164  
 4.998  
 4.832  
 4.665  
 4.498  
 4.331  
 4.164  
 3.998  
 3.832  
 3.665  
 3.498  
 3.331  
 3.164  
 2.998  
 2.832  
 2.665  
 2.498  
 2.331  
 2.164  
 1.998  
 1.832  
 1.665  
 1.498  
 1.331  
 1.164  
 0.998  
 0.832  
 0.665  
 0.498  
 0.331  
 0.164  
 0.000

206.455  
 167.690  
 150.285  
 150.148  
 148.797  
 147.356  
 137.143  
 132.904  
 127.295  
 121.710  
 121.554  
 113.982

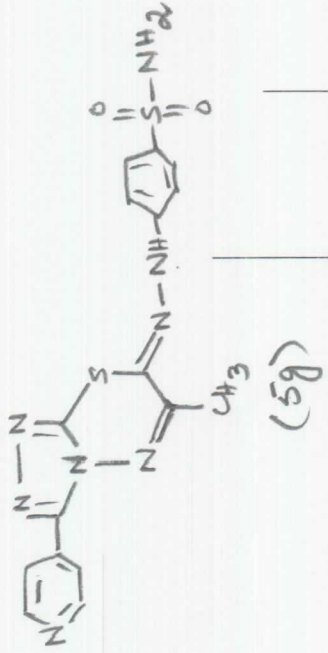

210 200 190 180 170 160 150 140 130 120 110 100 90 80 70 60 50 40 30 20 10 0 ppm

N-BBO DMSO D:\

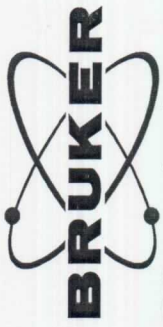

NAME dirmashoog-5H  
 EXPNO 10  
 PROCNO 1  
 Date 20140128  
 Time 22.54  
 INSTRUM spect  
 PROBHD 5 mm PABBO BB-  
 PULPROG zg30  
 TD 65536  
 SOLVENT DMSO  
 NS 16  
 DS 2  
 SWH 10330.578 Hz  
 FIDRES 0.157632 Hz  
 AQ 3.1720407 sec  
 RG 181  
 DW 48.400 usec  
 DE 6.50 usec  
 TE 297.5 K  
 D1 1.00000000 sec  
 TD0 1

==== CHANNEL f1 =====  
 NUC1 1H  
 P1 14.70 usec  
 PL1 -1.10 dB  
 SFO1 500.1330885 MHz  
 SI 32768  
 SF 500.1300000 MHz  
 WDW EM  
 SSB 0  
 LB 0.30 Hz  
 GB 0  
 PC 1.00

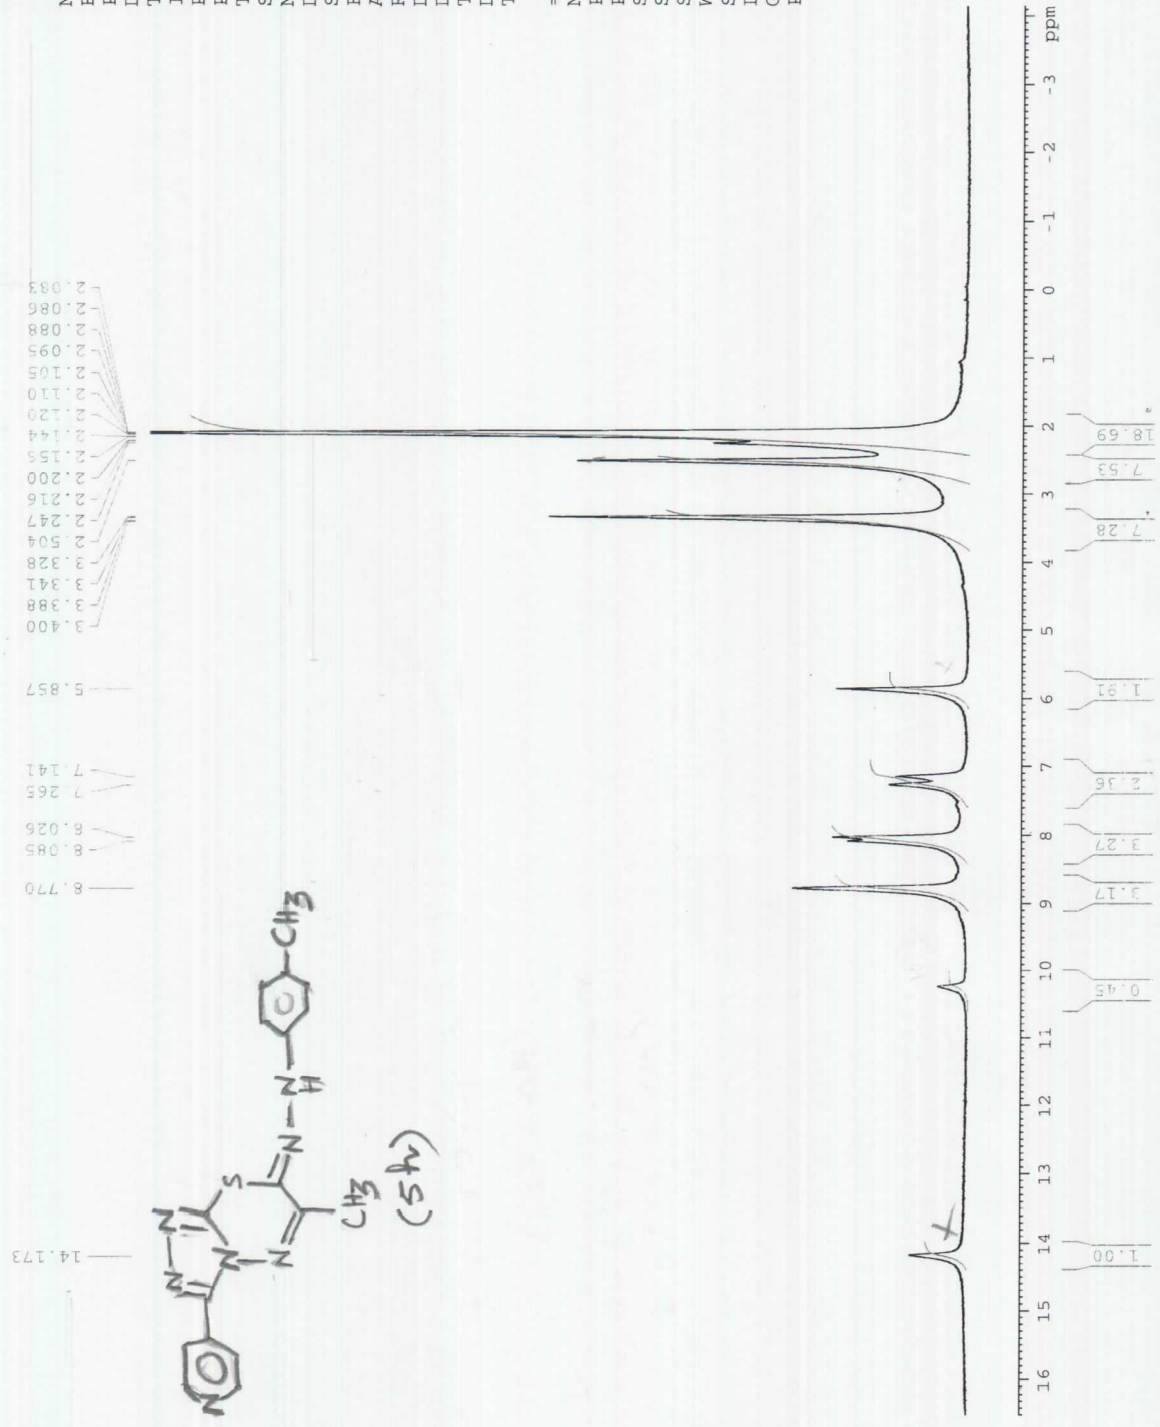

Supplement: f1 [file 897141.f1.pdf]
